# Supplementary material for: Endoglin and Activin Receptor-like Kinase 1 (Alk1) Modify Adrenomedullin Expression in an Organ-Specific Manner in Mice
Source: MDPI journal article supplement (doi:10.3390/biology11030358), 2022-02-24
Supplement: s1 [file s1]

**Endoglin and activin receptor-like kinase 1 (Alk1) modify adrenomedullin expression in an organ-specific manner in mice**

Josune García-Sanmartín<sup>1</sup>, Judit Narro<sup>1</sup>, Alicia Rodríguez-Barbero<sup>2</sup>, Alfredo Martínez<sup>1,\*</sup>

<sup>1</sup> Angiogenesis Unit, Oncology Area, Center for Biomedical Research of La Rioja (CIBIR), Piqueras 98, 26006 Logroño, Spain.

<sup>2</sup> Vascular Endothelium Pathophysiology (ENDOVAS) Unit, Department of Physiology and Pharmacology, University of Salamanca, and Biomedical Research Institute of Salamanca (IBSAL). Edificio Departamental, Campus Miguel de Unamuno, 37007, Salamanca, Spain.

\* Correspondence: [amartinezr@riojasalud.es](mailto:amartinezr@riojasalud.es)

**Supplementary material**

1. Original Western blot figures

Figure S1: (a) Adrenomedullin antibody and (b) GAPDH antibody in mouse lungs.

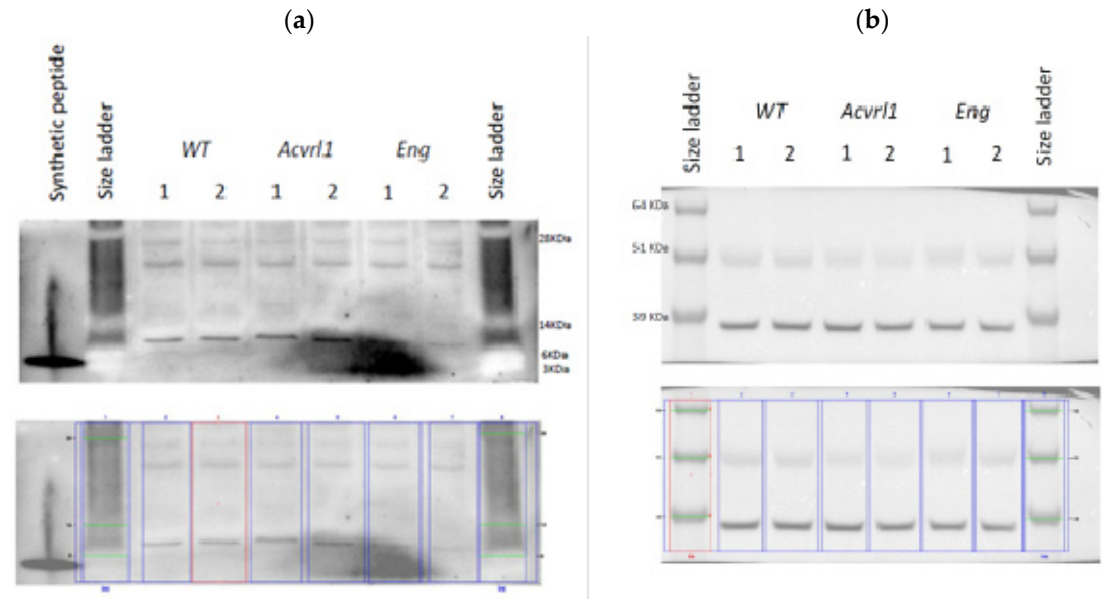

Table S1: Band quantification in mouse lungs.

|          | WT 1       | WT 2       | <i>Acvr1</i> 1 | <i>Acvr1</i> 2 | <i>Eng</i> 1 | <i>Eng</i> 2 |
|----------|------------|------------|----------------|----------------|--------------|--------------|
| AM       | 2544.76    | 2181.66    | 2596.23        | 2804.28        | 990.04       | 1295.54      |
| GAPDH    | 275428638  | 231912798  | 275797670      | 248280662      | 198631020    | 232202046    |
| AM/GAPDH | 9.2393E-06 | 9.4072E-06 | 9.4135E-06     | 1.1295E-05     | 4.9843E-06   | 5.5794E-06   |

| ratio     |      |       |       |       |      |      |
|-----------|------|-------|-------|-------|------|------|
| AM/GAPDH  | 99.1 | 100.9 | 101.0 | 121.1 | 53.5 | 59.8 |
| ratio (%) |      |       |       |       |      |      |

Figure S2: (a) Adrenomedullin antibody and (b) GAPDH antibody in mouse cerebellum.

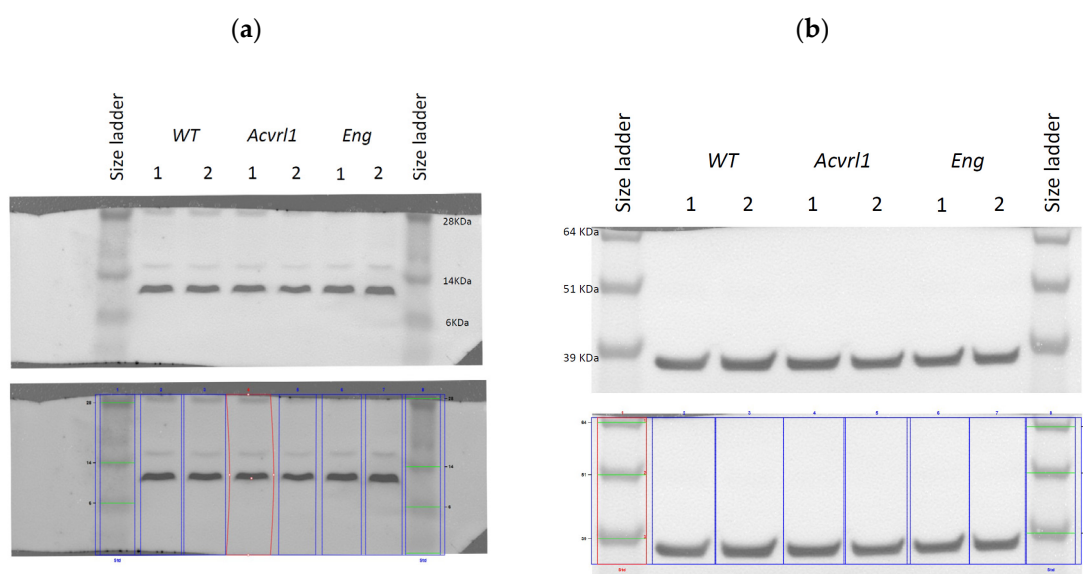

Table S2: Band quantification in mouse cerebellum.

|                    | WT 1      | WT 2      | Acvrl1 1  | Acvrl1 2  | Eng 1     | Eng 2     |
|--------------------|-----------|-----------|-----------|-----------|-----------|-----------|
| AM                 | 20961600  | 22343296  | 16939201  | 20045091  | 20574040  | 25328705  |
| GAPDH              | 463903784 | 399667554 | 393104299 | 437719666 | 393871494 | 373397486 |
| AM/GAPDH ratio     | 4.52E-02  | 5.59E-02  | 4.31E-02  | 4.58E-02  | 5.22E-02  | 6.78E-02  |
| AM/GAPDH ratio (%) | 89.4      | 110.6     | 85.3      | 90.6      | 103.4     | 134.2     |

Figure S3: (a) Adrenomedullin antibody and (b) GAPDH antibody in mouse skin.

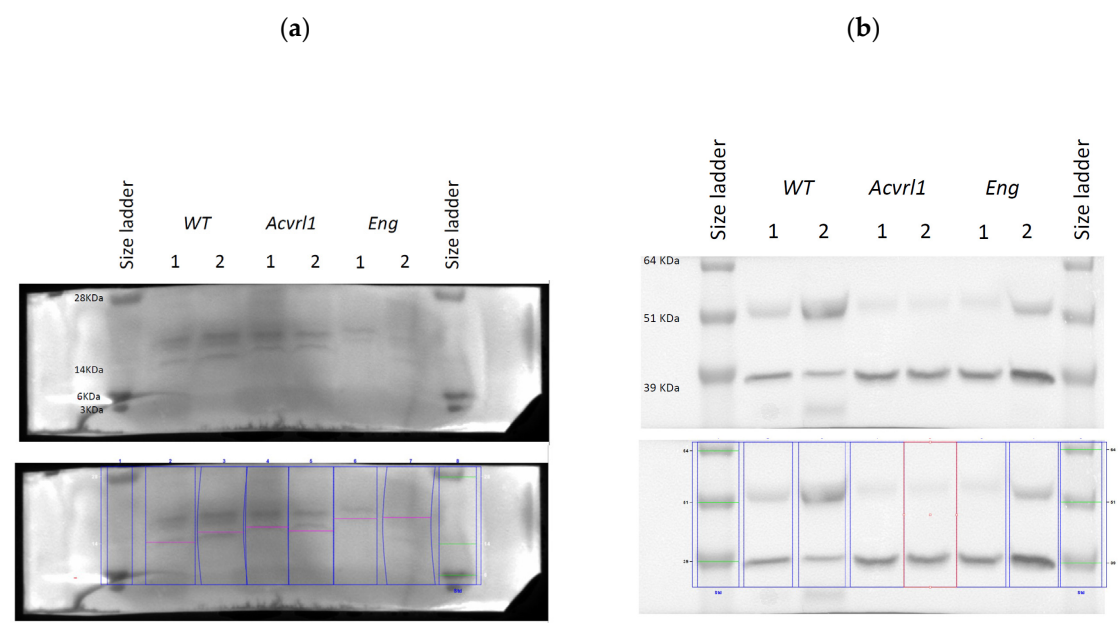

Table S3: Band quantification in mouse skin.

|                    | <i>WT</i> 1 | <i>WT</i> 2 | <i>Acvrl1</i> 1 | <i>Acvrl1</i> 2 | <i>Eng</i> 1 | <i>Eng</i> 2 |
|--------------------|-------------|-------------|-----------------|-----------------|--------------|--------------|
| AM                 | 8215.91     | 7548.03     | 4197.45         | 5164.85         | 606.94       | 2032.78      |
| GAPDH              | 267968101   | 151478424   | 362609134       | 374480248       | 570241848    | 352151835    |
| AM/GAPDH ratio     | 3.066E-05   | 4.9829E-05  | 1.1576E-05      | 1.3792E-05      | 1.0644E-06   | 5.7725E-06   |
| AM/GAPDH ratio (%) | 76.2        | 123.8       | 28.8            | 34.3            | 2.6          | 14.3         |

Figure S4: (a) Adrenomedullin antibody and (b) GAPDH antibody in mouse colon.

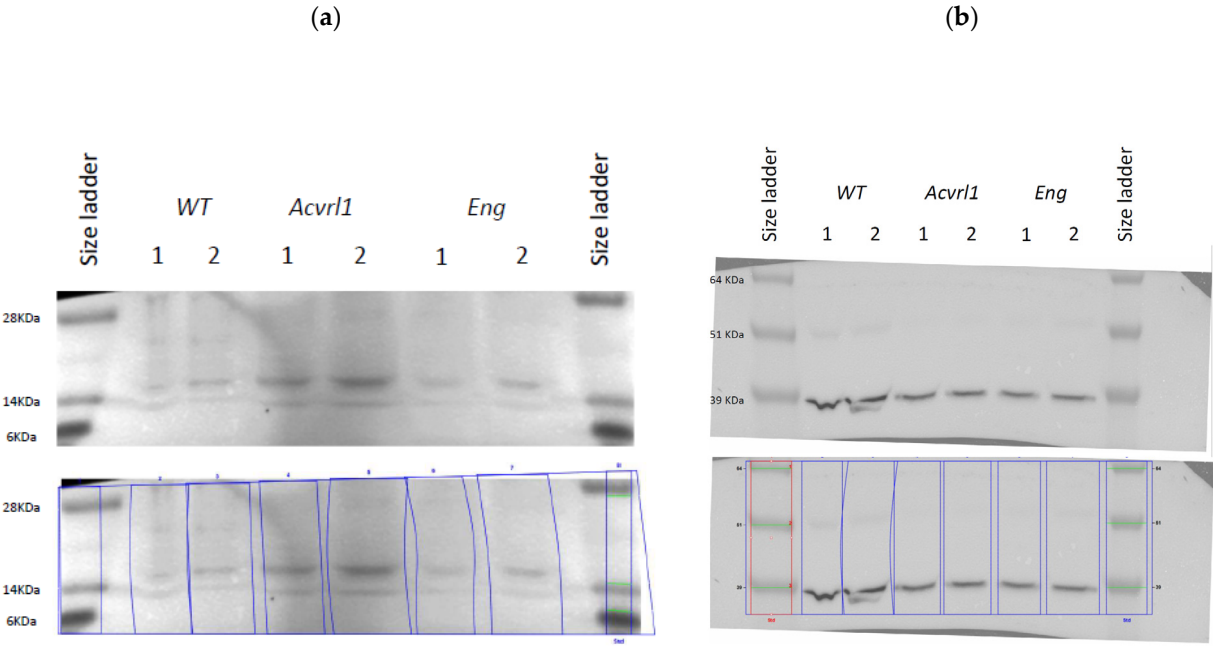

Table S4. Band quantification in mouse colon.

|                    | WT 1      | WT 2      | Acvrl1 1  | Acvrl1 2  | Eng 1     | Eng 2     |
|--------------------|-----------|-----------|-----------|-----------|-----------|-----------|
| AM                 | 1317.88   | 1546.3    | 3011.27   | 4159.36   | 918.55    | 1643.13   |
| GAPDH              | 251334846 | 203091180 | 154341714 | 145374968 | 134325920 | 147515670 |
| AM/GAPDH ratio     | 5.24E-06  | 7.61E-06  | 1.95E-05  | 2.86E-05  | 6.84E-06  | 1.11E-05  |
| AM/GAPDH ratio (%) | 81.6      | 118.4     | 303.5     | 445.0     | 106.4     | 173.3     |
